# Supplementary material for: Angular-dependent metal-enhanced fluorescence from silver colloid-deposited films: opportunity for angular-ratiometric surface assays
Source: Royal Society of Chemistry journal article supplement (doi:10.1039/b709170b), 2007-01-01
Supplement: b709170b.pdf [file b709170b.pdf]

**Supporting Information for the Manuscript:**

“Angular-Dependent Metal-Enhanced Fluorescence from Silver Colloid Deposited Films: Opportunity for Angular-Ratiometric Surface Assays” by Aslan *et al.*

Corresponding Author, Chris D. Geddes, E-mail: [geddes@umbi.umd.edu](mailto:geddes@umbi.umd.edu)

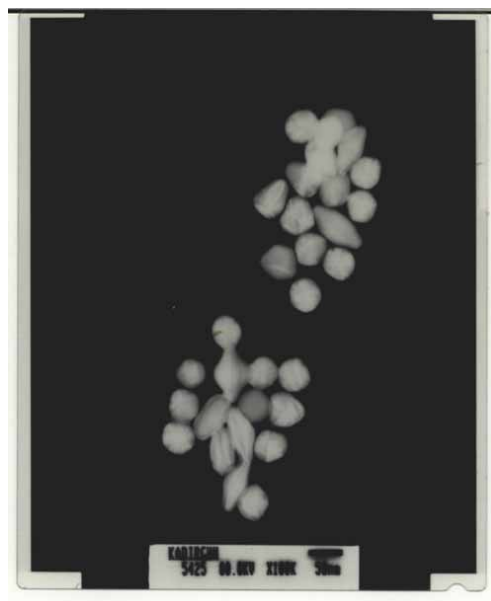

**Figure S1-** A typical Transmission Electron Microscopy (TEM) image of silver colloids used in this study. The scale is 50 nm.

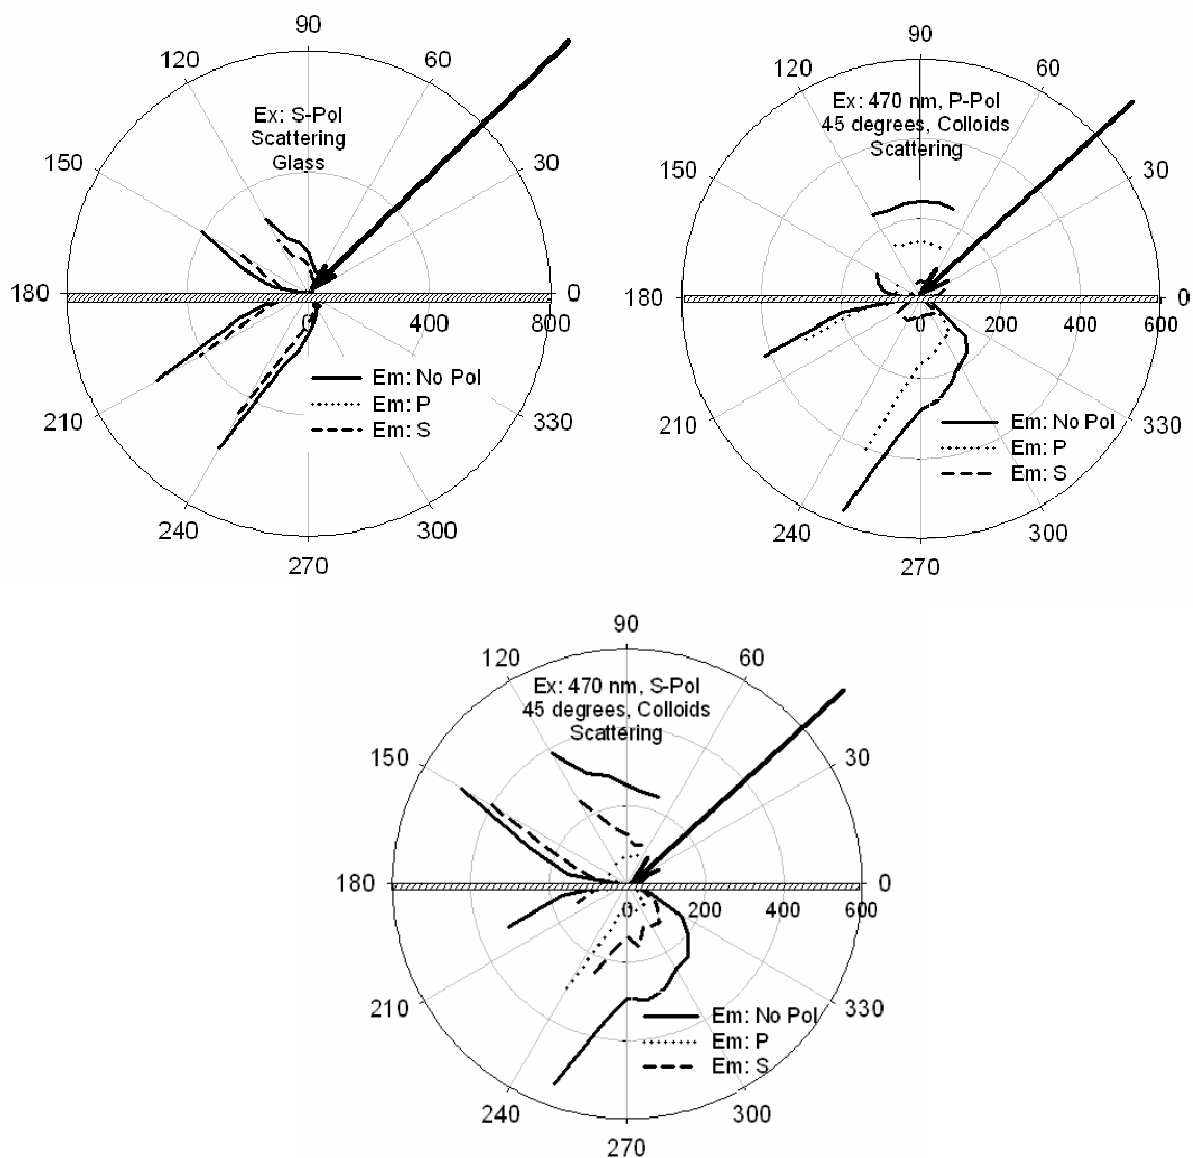

**Figure S2-** Angular dependent scattered light ( $p$ -polarized excitation 473 nm, 45 degrees) from glass (**Top-Left**), silver colloids OD = 0.42 (**Top-Right**), and angular dependent  $s$ -polarized scattered light from silver colloids (**Bottom**).

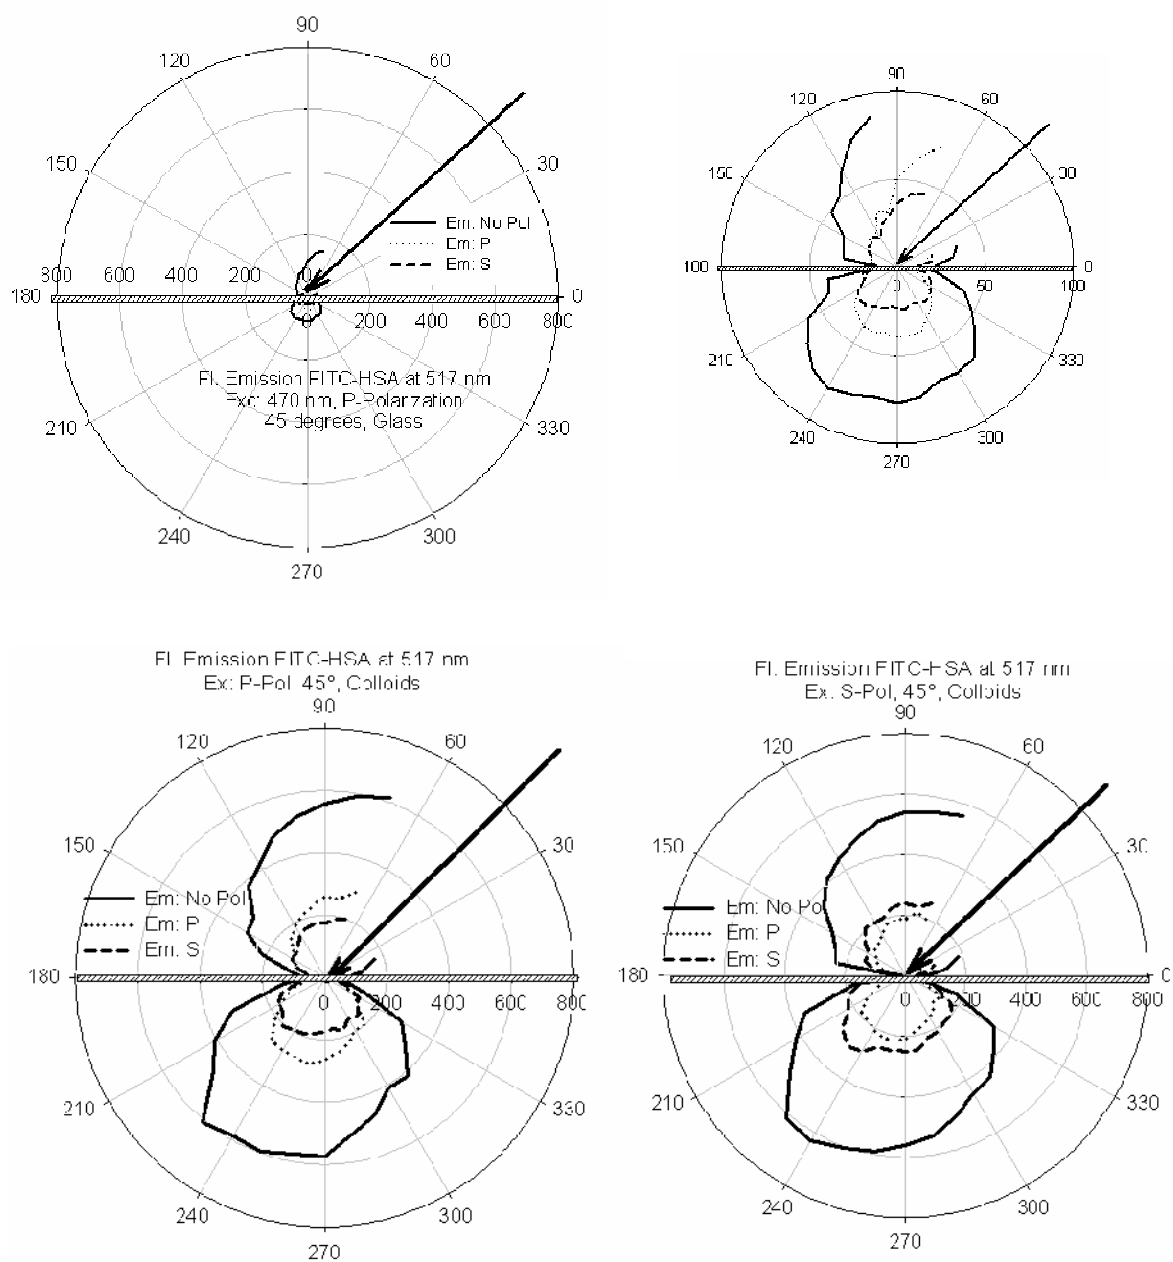

**Figure S3-** Angular dependent fluorescence emission intensity (measured at 517 nm, *p*-polarized excitation) for FITC-HSA on glass (**Top**) and silver colloids, OD = 0.42 (**Bottom**). Excitation was *p*-polarized and was at an angle of 45 degrees. The bottom-right figure shows the angular dependent emission for FITC-HSA on silver colloids with *s*-polarized excitation.

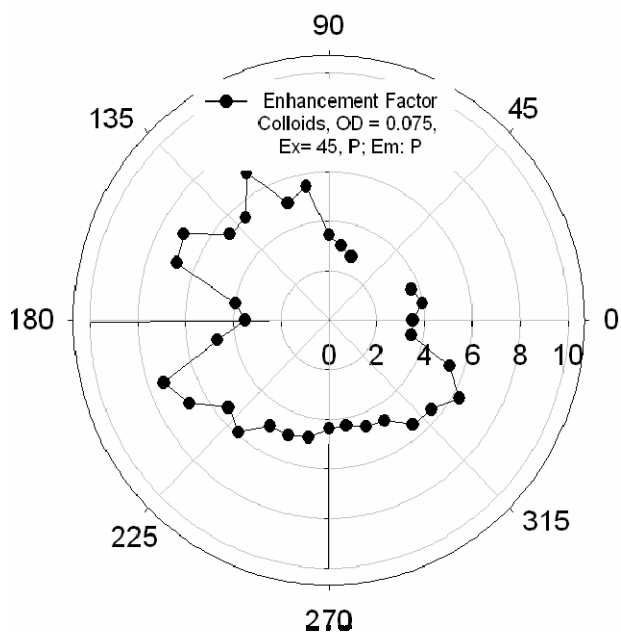

**Figure S4-** Angular-dependent metal-enhanced fluorescence (MEF) enhancement factor (emission intensity at 517 nm ( $I_{517}$ ) on silver colloids divided by  $I_{517}$  on glass). Fluorescence emission intensity was measured through a 488 nm razor-edge excitation filter. Excitation laser source was at an angle of 45 degrees.
